# Supplementary material
Source: publisher figshare collection journal article supplement (https://karger.figshare.com/ndownloader/files/20997858)
Supplement: Supplementary file 1 [file 20997858]

## **Supplementary Material**

Supplement to: Moradi H, Park C, Streja E, Argueta DA, DiPatrizio NV, You AS, Rhee CM, Vaziri ND, Kalantar-Zadeh K, Piomelli D. Association of Circulating Endocannabinoid Levels with Mortality in Patients on Maintenance Hemodialysis.

## Supplementary Methods

### Lipid Extraction and Analysis

Extraction and analysis of circulating ECBs were performed according to well-established and previously described methods.<sup>1-3</sup> Briefly, methanol (1 mL) containing internal standards [<sup>2</sup>H<sub>4</sub>]AEA (1 pmol) and [<sup>2</sup>H<sub>5</sub>]2AG (250 pmol) was added to patient serum (0.5 mL) and all lipids were extracted using chloroform (2 mL) and 0.1 M sodium chloride (0.5 mL). The organic phases were dried under N<sub>2</sub>, reconstituted in chloroform (2 mL) and underwent solid-phase extraction by application to open-bed silica gel columns to fractionate lipid groups based on polarity. Eluted fractions containing AEA and 2-AG (chloroform/methanol, 9:1, v/v) were again dried under N<sub>2</sub> and reconstituted in 120 µL of solvent mixture of chloroform and methanol (1:1, v/v) for UPLC/MS/MS analyses.<sup>4</sup>

### Analyses of 2-AG and AEA by UPLC/MS/MS

Lipids were analyzed using a Waters Acquity I-Class Ultra Performance Liquid Chromatography system coupled to a Waters TQS-micro Triple Quadrupole Mass Spectrometer. All samples were analyzed after one freeze-thaw cycle to avoid confounding by sample preparation. Lipids were separated using an Acquity UPLC BEH C18 column (50 x 2.1 mm; i.d. 1.7 µm), eluted by a gradient of methanol (0.25% acetic acid, 5mM ammonium acetate) in water (0.25% acetic acid, 5mM ammonium acetate) (from 80 to 100% methanol in 2.5 min, 100% 2.5-3.0 min, 100-80% 3.0-3.1 min) at a flow rate of 0.4 mL/min. Column temperature was kept at 40° C and samples were maintained in the sample manager at 10° C. Argon was used as collision gas (99.998% pure). 2-arachidonoyl-*sn*-glycerol (2-AG), anandamide (AEA), [<sup>2</sup>H<sub>5</sub>] 2-AG, and [<sup>2</sup>H<sub>4</sub>] AEA were identified in the positive ionization mode based on their retention times and

MS<sup>2</sup> properties and capillary voltage set at 0.1 kV. Cone voltage and collision energy as follows, respectively: 2-AG = 30v, 12v; [<sup>2</sup>H<sub>5</sub>] 2-AG = 25v, 44v; anandamide = 30v, 14v; [<sup>2</sup>H<sub>4</sub>] anandamide = 26v, 16v. ECBs were quantified using a stable isotope dilution method detecting protonated adducts of the molecular ions [M+H]<sup>+</sup> in the multiple reaction monitoring (MRM) mode. Acyl migration from sn-2 to sn-1 positions in monoacylglycerols is known to occur; thus, the sum of these isoforms (1-AG and 2-AG) was used as the concentration of serum 2-AG. Extracted ion chromatograms were used to quantify 2-AG ( $m/z = 379.2 > 287.26$ ) and AEA ( $m/z = 348.3 > 62.04$ ), and [<sup>2</sup>H<sub>5</sub>] 2-AG ( $m/z = 384.2 > 93.4$ ), and [<sup>2</sup>H<sub>4</sub>] AEA ( $m/z = 352.3 > 66.11$ ), which were used as internal standards (Cayman Chemical, Ann Arbor, MI, USA).<sup>5</sup>

## Supplementary Tables

**Table S1.** Unadjusted and adjusted Spearman's rank correlation coefficients (Rho) between serum 2-AG and data on laboratory, clinical, quality of life and depression tests in 400 maintenance hemodialysis patients.

| Variable                                        | Unadjusted |         | Adjusted* |         |
|-------------------------------------------------|------------|---------|-----------|---------|
|                                                 | Rho        | P-value | Rho       | P-value |
| Laboratory tests                                |            |         |           |         |
| Hemoglobin (g/dL)                               | -0.10      | 0.06    | -0.07     | 0.20    |
| Iron saturation (%)                             | -0.07      | 0.23    | -0.03     | 0.61    |
| UIBC ( $\mu\text{g/dL}$ )                       | 0.15       | 0.005   | 0.16      | 0.005   |
| Lymphocytes (%)                                 | 0.03       | 0.59    | 0.03      | 0.64    |
| White blood cell ( $\times 1000 \text{ mm}^3$ ) | 0.08       | 0.14    | 0.08      | 0.16    |
| nPCR (g/kg/d)                                   | 0.02       | 0.75    | 0.08      | 0.15    |
| TBW (Watson) (l)                                | 0.10       | 0.07    | 0.18      | 0.001   |
| Weight (kg)                                     | 0.18       | 0.0007  | 0.19      | 0.0008  |
| Pre-dialysis weight (kg)                        | 0.19       | 0.0006  | 0.19      | 0.0006  |
| Post-dialysis weight (kg)                       | 0.19       | 0.0004  | 0.20      | 0.0004  |
| Quality of life measures                        |            |         |           |         |
| Physical functioning                            | -0.07      | 0.19    | -0.04     | 0.43    |
| Role limitations due to physical health         | 0.04       | 0.42    | 0.05      | 0.33    |
| Role limitations due to emotional problems      | -0.05      | 0.31    | -0.06     | 0.25    |
| Energy/fatigue                                  | -0.01      | 0.83    | -0.009    | 0.86    |
| Emotional well-being                            | 0.02       | 0.64    | 0.01      | 0.86    |
| Social functioning                              | 0.07       | 0.21    | 0.06      | 0.24    |
| Pain                                            | 0.01       | 0.78    | 0.04      | 0.50    |
| General health                                  | 0.004      | 0.94    | 0.009     | 0.86    |
| Physical health                                 | 0.00005    | 1.00    | 0.02      | 0.69    |
| Mental health                                   | -0.01      | 0.84    | -0.01     | 0.78    |
| Beck Depression Index score                     | -0.03      | 0.61    | -0.03     | 0.56    |

\*Results were adjusted for age, gender, race, ethnicity, diabetes and dialysis vintage.

Abbreviations: 2-AG, 2-arachidonoyl-*sn*-glycerol; nPCR, normalized protein catabolic rate; TBW, total body water (Watson formula); UIBC, unsaturated iron binding capacity.

**Table S2.** Unadjusted and adjusted Spearman's rank correlation coefficients (Rho) between serum AEA and data on laboratory, clinical, quality of life and depression tests in 436 maintenance hemodialysis patients.

| Variable                                        | Unadjusted |         | Adjusted* |         |
|-------------------------------------------------|------------|---------|-----------|---------|
|                                                 | Rho        | P-value | Rho       | P-value |
| Laboratory tests                                |            |         |           |         |
| Hemoglobin (g/dL)                               | -0.02      | 0.68    | 0.03      | 0.60    |
| Iron saturation (%)                             | -0.11      | 0.04    | -0.05     | 0.36    |
| UIBC ( $\mu\text{g/dL}$ )                       | 0.02       | 0.65    | 0.01      | 0.82    |
| Lymphocytes (%)                                 | -0.11      | 0.04    | -0.12     | 0.03    |
| White blood cell ( $\times 1000 \text{ mm}^3$ ) | 0.06       | 0.26    | 0.06      | 0.29    |
| nPCR (g/kg/d)                                   | -0.17      | 0.0009  | -0.06     | 0.27    |
| TBW (Watson) (l)                                | 0.08       | 0.13    | 0.06      | 0.27    |
| Weight (kg)                                     | 0.09       | 0.10    | 0.02      | 0.76    |
| Pre-dialysis weight (kg)                        | 0.09       | 0.09    | 0.02      | 0.69    |
| Post-dialysis weight (kg)                       | 0.09       | 0.08    | 0.02      | 0.67    |
| Quality of life measures                        |            |         |           |         |
| Physical functioning                            | 0.03       | 0.55    | 0.11      | 0.03    |
| Role limitations due to physical health         | -0.004     | 0.94    | 0.04      | 0.43    |
| Role limitations due to emotional problems      | 0.006      | 0.91    | 0.03      | 0.57    |
| Energy/fatigue                                  | 0.02       | 0.73    | 0.03      | 0.51    |
| Emotional well-being                            | 0.10       | 0.05    | 0.10      | 0.05    |
| Social functioning                              | 0.05       | 0.36    | 0.07      | 0.19    |
| Pain                                            | -0.004     | 0.94    | 0.04      | 0.40    |
| General health                                  | 0.02       | 0.71    | 0.01      | 0.82    |
| Physical health                                 | 0.01       | 0.81    | 0.06      | 0.21    |
| Mental health                                   | 0.04       | 0.43    | 0.06      | 0.24    |
| Beck Depression Index score                     | -0.04      | 0.47    | -0.03     | 0.56    |

\*Results were adjusted for age, gender, race, ethnicity, diabetes and dialysis vintage.

Abbreviations: AEA, anandamide; nPCR, normalized protein catabolic rate; TBW, total body water (Watson formula); UIBC, unsaturated iron binding capacity.

**Table S3.** Incidence rates and hazard ratios (HR) with 95% confidence intervals (CI) for 12-month all-cause mortality according to serum 2-AG categories (reference, <32.5 pmol/mL) among 400 maintenance hemodialysis patients with 4 models of adjustment: (i) model 1 (unadjusted); (ii) model 2 (age, gender, race and ethnicity); (iii) model 3 (model 2 + diabetes and dialysis vintage); and (iv) model 4 (model 3 + IL-6).

|                      |     |                    | 12-month All-Cause Mortality        |                   |                 |                   |                 |                   |                 |                   |         |
|----------------------|-----|--------------------|-------------------------------------|-------------------|-----------------|-------------------|-----------------|-------------------|-----------------|-------------------|---------|
|                      |     |                    | Model 1 (N=400)                     |                   | Model 2 (N=400) |                   | Model 3 (N=400) |                   | Model 4 (N=400) |                   |         |
| Serum 2-AG (pmol/mL) | N   | Mortality N (row%) | Mortality rate per 100 person-years | HR (95% CI)       | P-value         | HR (95% CI)       | P-value         | HR (95% CI)       | P-value         | HR (95% CI)       | P-value |
| <32.5                | 200 | 24 (12)            | 13.4 (8.0, 18.7)                    | Reference         |                 | Reference         |                 | Reference         |                 | Reference         |         |
| ≥32.5                | 200 | 19 (10)            | 10.1 (5.6, 14.7)                    | 0.75 (0.41, 1.37) | 0.35            | 0.55 (0.29, 1.02) | 0.06            | 0.52 (0.28, 0.99) | 0.04            | 0.52 (0.28, 0.98) | 0.04    |
| Total                | 400 | 43                 |                                     |                   |                 |                   |                 |                   |                 |                   |         |

**Table S4.** Incidence rates and hazard ratios (HR) with 95% confidence intervals (CI) for 12-month all-cause mortality according to serum AEA categories (reference, <1.06 pmol/mL) among 436 maintenance hemodialysis patients with 4 models of adjustment: (i) model 1 (unadjusted); (ii) model 2 (age, gender, race and ethnicity); (iii) model 3 (model 2 + diabetes and dialysis vintage); and (iv) model 4 (model 3 + IL-6).

|                     |     |                    |                                     | 12-month All-Cause Mortality |         |                   |         |                   |         |                   |         |
|---------------------|-----|--------------------|-------------------------------------|------------------------------|---------|-------------------|---------|-------------------|---------|-------------------|---------|
|                     |     |                    |                                     | Model 1 (N=436)              |         | Model 2 (N=436)   |         | Model 3 (N=436)   |         | Model 4 (N=436)   |         |
| Serum AEA (pmol/mL) | N   | Mortality N (row%) | Mortality rate per 100 person-years | HR (95% CI)                  | P-value | HR (95% CI)       | P-value | HR (95% CI)       | P-value | HR (95% CI)       | P-value |
| <1.06               | 217 | 19 (9)             | 9.5 (5.2, 13.8)                     | Reference                    |         | Reference         |         | Reference         |         | Reference         |         |
| ≥1.06               | 219 | 28 (13)            | 14.0 (8.8, 19.2)                    | 1.48 (0.83, 2.65)            | 0.19    | 1.07 (0.59, 1.95) | 0.83    | 1.07 (0.58, 1.97) | 0.84    | 0.91 (0.48, 1.72) | 0.77    |
| Total               | 436 | 47                 |                                     |                              |         |                   |         |                   |         |                   |         |

## Supplementary Figures

**Figure S1.** Association of serum 2-AG and 12-month all-cause mortality among 400 maintenance hemodialysis patients across 4 levels of adjustment: (i) model 1 (unadjusted); (ii) model 2 (age, gender, race and ethnicity); (iii) model 3 (model 2 + diabetes and dialysis vintage); and (iv) model 4 (model 3 + IL-6).

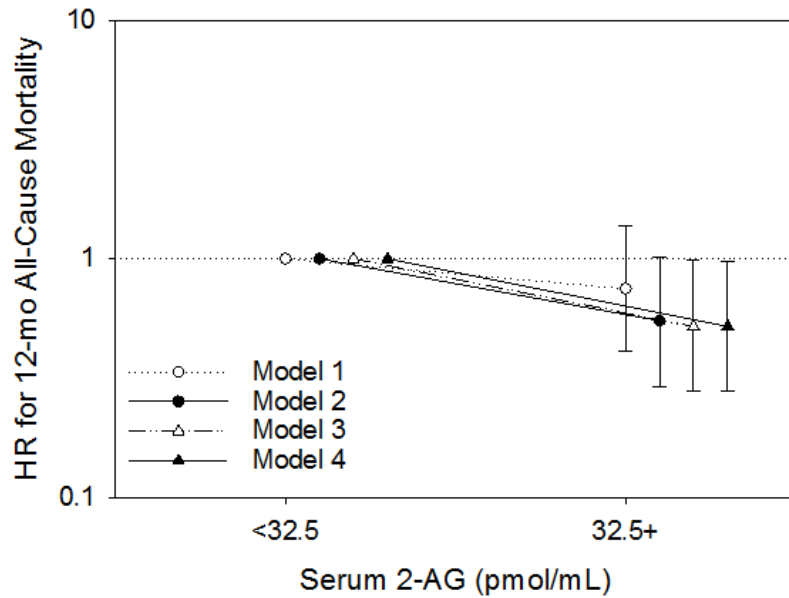

For visual purposes only, the y-axis was log-transformed.

Abbreviations: 2-AG, 2-arachidonoyl-*sn*-glycerol; HR, hazard ratio; mo, month.



**Figure S2.** Association of serum AEA and 12-month all-cause mortality among 436 maintenance hemodialysis patients across 4 levels of adjustment: (i) model 1 (unadjusted); (ii) model 2 (age, gender, race and ethnicity); (iii) model 3 (model 2 + diabetes and dialysis vintage); and (iv) model 4 (model 3 + IL-6).

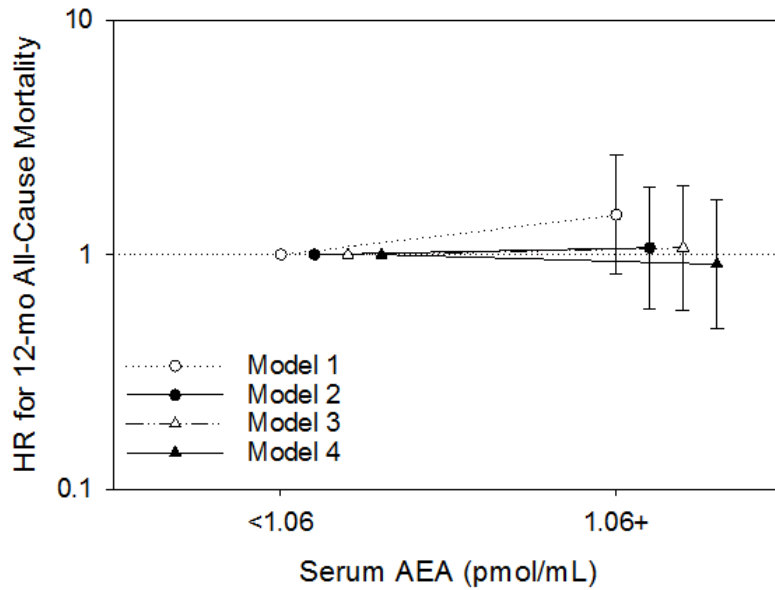

For visual purposes only, the y-axis was log-transformed.  
Abbreviations: AEA, anandamide; HR, hazard ratio; mo, month.

## Supplementary Material References

1. Angelini R, Argueta DA, Piomelli D and DiPatrizio NV. Identification of a Widespread Palmitoylethanolamide Contamination in Standard Laboratory Glassware. *Cannabis Cannabinoid Res.* 2017;2:123-132.
2. Price CA, Argueta DA, Medici V, Bremer AA, Lee V, Nunez MV, Chen GX, Keim NL, Havel PJ, Stanhope KL and DiPatrizio NV. Plasma fatty acid ethanolamides are associated with postprandial triglycerides, ApoCIII, and ApoE in humans consuming a high-fructose corn syrup-sweetened beverage. *Am J Physiol Endocrinol Metab.* 2018;315:E141-E149.
3. Little TJ, Cvijanovic N, DiPatrizio NV, Argueta DA, Rayner CK, Feinle-Bisset C and Young RL. Plasma endocannabinoid levels in lean, overweight, and obese humans: relationships to intestinal permeability markers, inflammation, and incretin secretion. *Am J Physiol Endocrinol Metab.* 2018;315:E489-E495.
4. Asgari A, Semnani S, Atapour N, Shojaei A, Moradi H and Mirnajafi-Zadeh J. Combined sub-threshold dosages of phenobarbital and low-frequency stimulation effectively reduce seizures in amygdala-kindled rats. *Neurol Sci.* 2014;35:1255-60.
5. Argueta DA and DiPatrizio NV. Peripheral endocannabinoid signaling controls hyperphagia in western diet-induced obesity. *Physiol Behav.* 2017;171:32-39.
